# Supplementary material
Source: PubMed Central journal article supplement (PMC7515636)
Supplement: NIHMS1620351-supplement-Supplementary_Figures.pdf [file NIHMS1620351-supplement-Supplementary_Figures.pdf]

## **HYPERSol: high-quality data from archival FFPE tissue for clinical proteomics**

Dylan M. Marchione<sup>1</sup>, Ilyana Ilieva<sup>2</sup>, Kyle Devins<sup>2</sup>, Danielle Sharpe<sup>2</sup>, Darryl J. Pappin<sup>3,4</sup>, Benjamin A. Garcia<sup>1</sup>, John P. Wilson<sup>4\*</sup>, and John B. Wojcik<sup>2\*\*†</sup>

1. Epigenetics Institute, Department of Biochemistry & Biophysics, University of Pennsylvania, Philadelphia PA
2. Department of Pathology and Laboratory Medicine, University of Pennsylvania, Philadelphia PA
3. Cold Spring Harbor Laboratory, Cold Spring Harbor NY
4. ProtiFi, LLC, Huntington NY john@protifi.com

\*Corresponding authors (jbwojcik5@gmail.com, john@protifi.com)

†Current address: Bristol-Myers Squibb, Lawrenceville NJ

### **Table of Contents**

|                                                                                                     | Page |
|-----------------------------------------------------------------------------------------------------|------|
| Figure S1. Direct solubilization combined with ultrasonication efficiently solubilizes FFPE samples | S-2  |
| Figure S2. Peptides from FFPE samples contain missed cleavages and modifications                    | S-4  |
| Table S1. Experiment 1 Peptide Report                                                               |      |
| Table S2. Experiment 1 Protein Report                                                               |      |
| Table S3. Experiment 1 Unique Peptides and Protein Modifications                                    |      |
| Table S4. Experiment 1 Gene Ontology Terms                                                          |      |
| Table S5. Experiment 2 Peptide Report                                                               |      |
| Table S6. Experiment 2 Protein Report                                                               |      |
| Table S7. Experiment 2 Protein Correlation Matrix                                                   |      |
| Table S8. Experiment 2 Volcano Plots                                                                |      |
| Table S9. Archival FFPE Tumor Specimen Protein Report                                               |      |
| Table S10. Archival FFPE Tumor Specimen Age and Number of Protein IDs                               |      |
| Table S11. Raw File Names and Conditions                                                            |      |

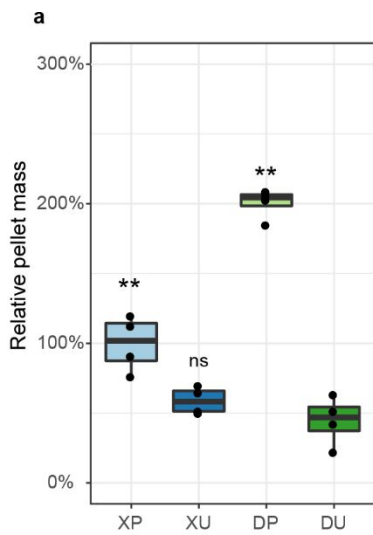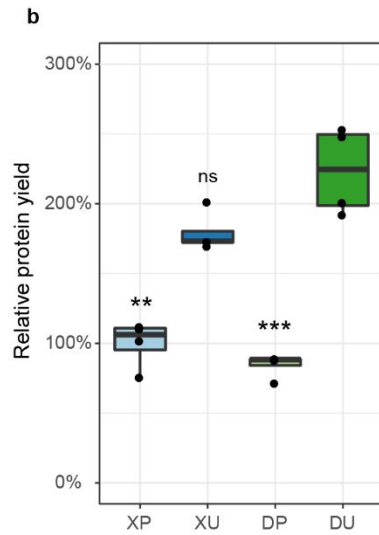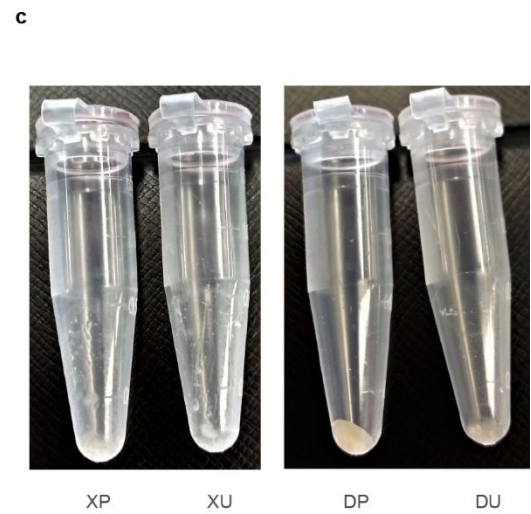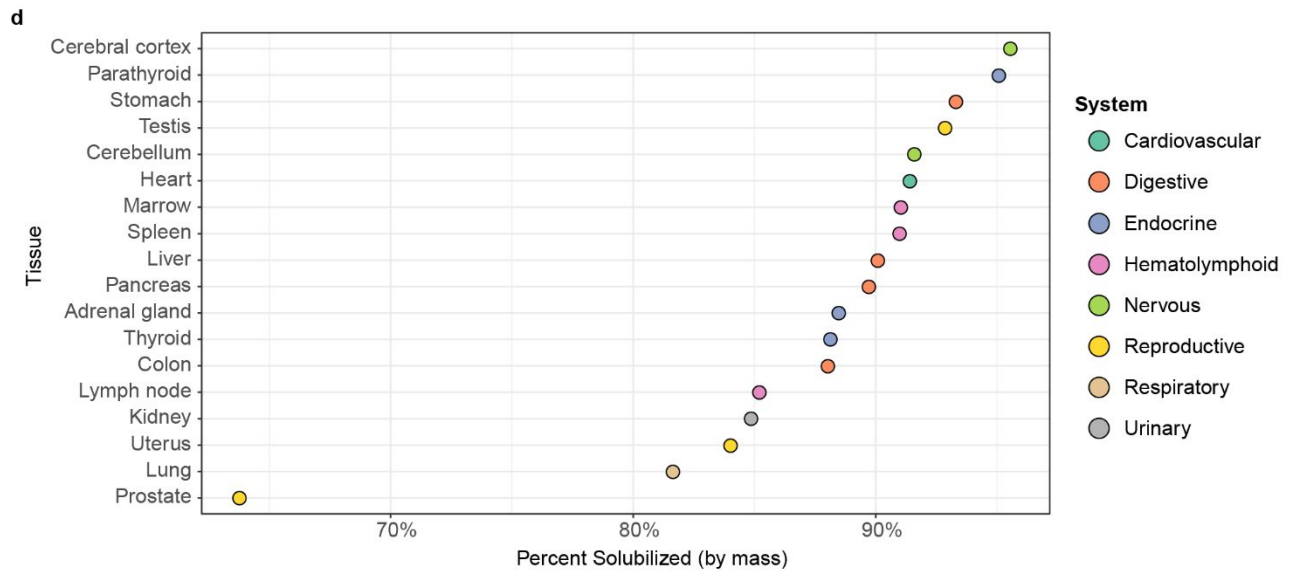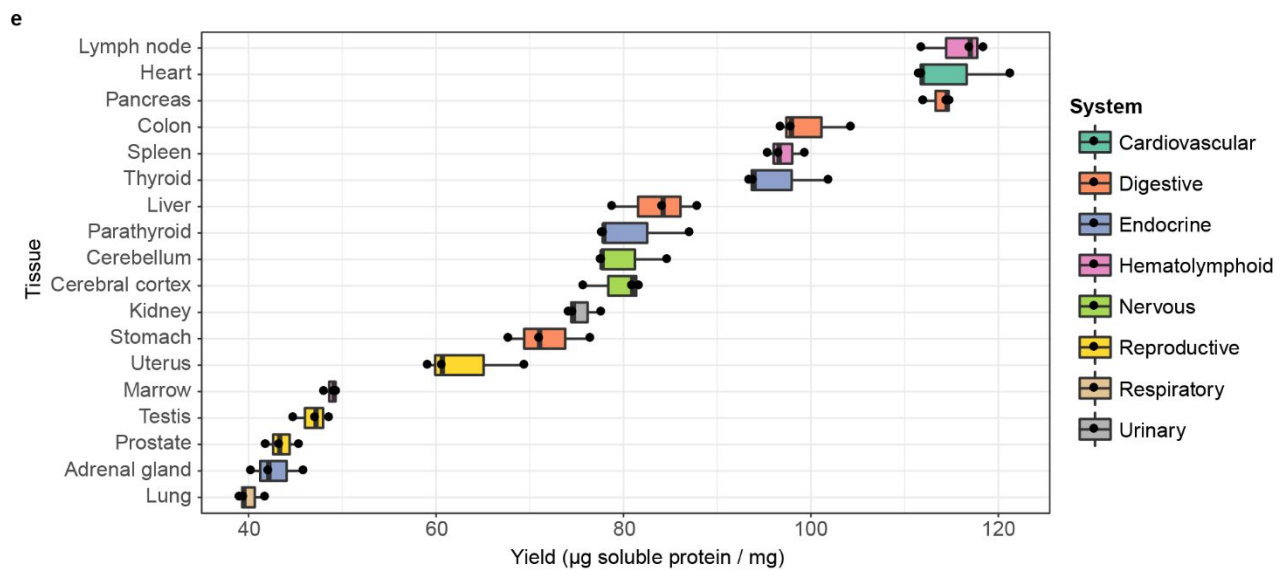

**Figure S1. Direct solubilization combined with ultrasonication efficiently solubilizes FFPE samples.** a). Bar graph of relative residual pellet mass, normalized to initial pellet mass. XP: xylene-ethanol, probe. XU: xylene-ethanol, ultrasonication. DP: direct, probe. DU: direct, ultrasonication. b). Bar graph of relative protein yields, normalized to initial pellet mass. For bar graphs, means  $\pm$  standard deviations are shown ( $n = 4$ ), and asterisks indicate statistical significance compared to HYPERsol with Welch's two-tailed t-test and  $p < 0.05 = *$ ,  $p < 0.01 = **$ , and  $p < 0.001 = ***$ . c). Representative images of residual material after each combination of conditions. d). Scatter plot depicting the extent of solubilization of 18 FFPE human tissue samples ( $n = 1$ ). e) Scatter plot depicting protein yield per milligram of FFPE across 18 human tissue samples ( $n = 1$ ). Error bars depict the standard deviation from 3 technical replicates of the BCA assay.

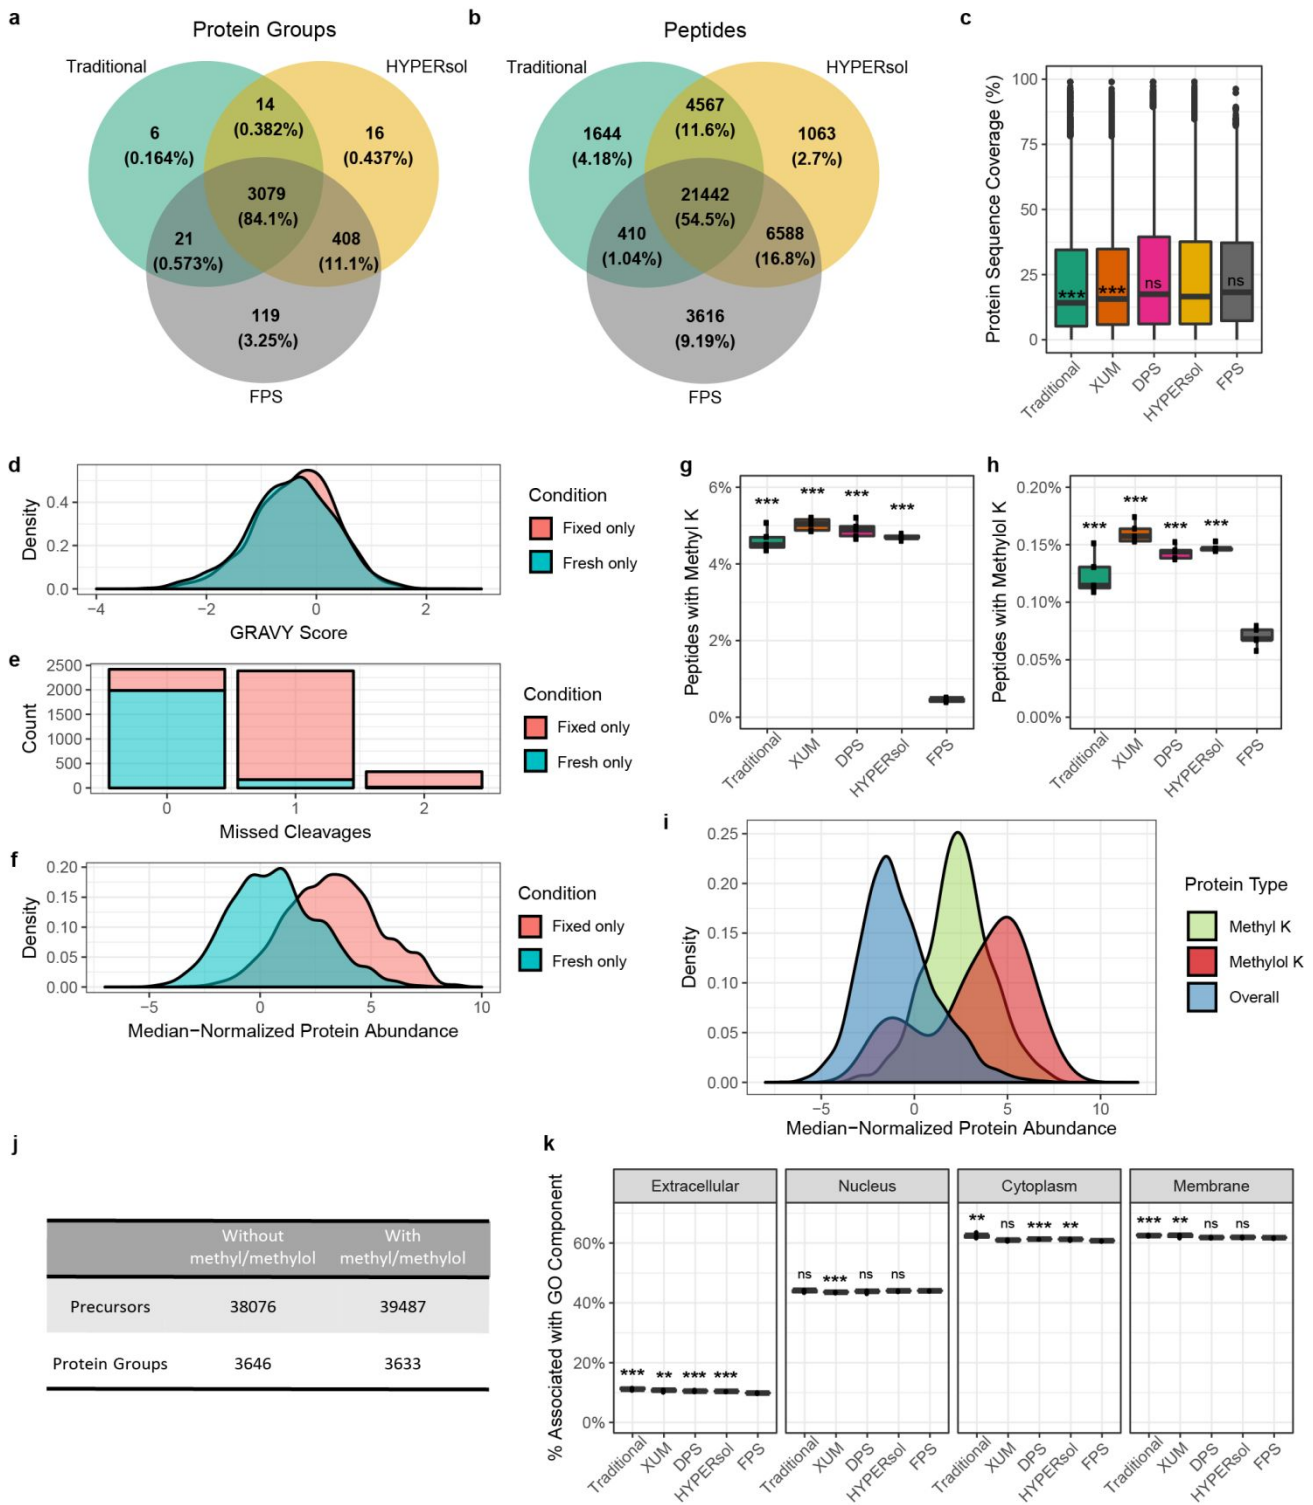

**Figure S2. Peptides from FFPE samples contain missed cleavages and modifications.** a) Venn diagram illustrating the overlap among detected proteins in Traditional, HYPERsol, and FPS. b) Venn diagram illustrating the overlap among detected proteins in Traditional, HYPERsol, and FPS. c) Tukey boxplot depicting average sequence coverage across conditions. d-f) Density plots depicting grand average of hydrophathy (GRAVY) scores (d), missed cleavage counts (e), and median-normalized protein abundance (f) associated with peptides that were S-3

unique to either FFPE samples (pink) or flash-frozen samples (blue). g-h) Tukey boxplot depicting the fraction of peptides containing methyl lysine (g) or methylol lysine (h) across experimental conditions. i) Density plot depicting median-normalized protein abundance of methylated proteins (green), or methylolated proteins (red), relative to the entire dataset (blue). j) Table illustrating the effect of including methyl and methylol lysine as variable modifications on spectral library size in Spectronaut. k) Tukey boxplot depicting the fraction of identified proteins associated with each Gene Ontology (GO) Component term. The conditions were: Traditional: xylene-ethanol, probe, methanol-chloroform. XUM: xylene-ethanol, ultrasonication, methanol-chloroform. DPS: direct, probe, S-Trap. HYPERSol: direct, ultrasonication, S-Trap. FPS: flash-frozen, probe, S-Trap. For box plots,  $n = 5$ . In panel c) asterisks indicate statistical significance when compared to HYPERSol with Welch's two-tailed t-test and  $p < 0.05 = *$ ,  $p < 0.01 = **$ , and  $p < 0.001 = ***$ . In panel k), conditions were compared against FPS rather than HYPERSol.
